# Supplementary material for: Identification and Development of Synovial B-Cell-Related Genes Diagnostic Signature for Rheumatoid Arthritis
Source: Hindawi journal article supplement (doi:10.1155/2023/9422990), 2023-11-25
Supplement: f1 [file 9422990.f1.pdf]

Supplementary Table S1: The clinical characteristics of participants.

| Characteristics               | Rheumatoid arthritis   | Osteoarthritis |
|-------------------------------|------------------------|----------------|
| Number                        | 25                     | 25             |
| Age (years) <sup>a</sup>      | 63.25 ± 10.24          | 65.34 ± 13.25  |
| Sex (Male/Female)             | 5/20                   | 5/20           |
| Anti-CCP (IU/mL) <sup>b</sup> | 102.50 (37.00, 251.50) | /              |
| RF (IU/mL) <sup>b</sup>       | 67.00 (35.50, 148.50)  | /              |
| CRP (mm/h) <sup>b</sup>       | 10.35 (3.16, 17.78)    | /              |
| ESR (mg/mL) <sup>b</sup>      | 31.00 (24.50, 41.00)   | /              |

<sup>a</sup> Expressed as the median (25th to 75th percentile).

<sup>b</sup> Expressed as the means ± SD (standard deviation).

Abbreviations: anti-CCP, anti-cyclic citrullinated peptide antibody; RF, rheumatoid factor; CRP, C-reactive protein; ESR, erythrocyte sedimentation rate.







Supplementary Table S4: The mean result of 10 single runs of the machine learning (ML) model for the training set in RA vs. HC.

| ML model     | AUC(95%CI)          | cutof(95%CI)       | Accuracy(95%CI)    | Sensitivity(95%CI) | Specificity(95%CI) | Positive predictive value(95%CI) | Negative predictive value(95%CI) | F1 score(95%CI)    | Kappa(95%CI)       |
|--------------|---------------------|--------------------|--------------------|--------------------|--------------------|----------------------------------|----------------------------------|--------------------|--------------------|
| XGBoost      | 0.999 (0.997-1.000) | 0.906(0.877-0.934) | 0.975(0.969-0.981) | 0.979(0.972-0.985) | 1.000(1.000-1.000) | 1.000(1.000-1.000)               | 0.864(0.837-0.892)               | 0.989(0.986-0.993) | 0.912(0.892-0.931) |
| logistic     | 0.988 (0.972-1.000) | 0.664(0.616-0.712) | 0.963(0.955-0.972) | 0.972(0.962-0.982) | 0.959(0.949-0.969) | 0.992(0.991-0.994)               | 0.833(0.807-0.858)               | 0.982(0.977-0.987) | 0.869(0.848-0.890) |
| LightGBM     | 1.000 (NaN-1.000)   | 0.873(0.832-0.915) | 0.993(0.993-0.993) | 1.000(1.000-1.000) | 1.000(1.000-1.000) | 1.000(1.000-1.000)               | 0.958(0.956-0.960)               | 1.000(1.000-1.000) | 0.974(0.973-0.975) |
| RandomForest | 1.000 (NaN-1.000)   | 0.700(0.631-0.769) | 0.988(0.983-0.992) | 1.000(1.000-1.000) | 1.000(1.000-1.000) | 1.000(1.000-1.000)               | 0.926(0.897-0.954)               | 1.000(1.000-1.000) | 0.953(0.935-0.972) |
| AdaBoost     | 1.000 (NaN-1.000)   | 0.695(0.660-0.730) | 0.992(0.990-0.993) | 1.000(1.000-1.000) | 1.000(1.000-1.000) | 1.000(1.000-1.000)               | 0.949(0.937-0.961)               | 1.000(1.000-1.000) | 0.969(0.961-0.976) |
| CNB          | 0.744 (0.667-0.821) | 0.747(0.682-0.812) | 0.676(0.655-0.698) | 0.629(0.599-0.660) | 0.969(0.942-0.995) | 0.992(0.985-0.999)               | 0.326(0.313-0.339)               | 0.769(0.748-0.790) | 0.328(0.311-0.345) |
| MLP          | 0.816 (0.781-0.849) | 0.915(0.773-1.057) | 0.790(0.617-0.963) | 0.764(0.554-0.975) | 0.968(0.949-0.988) | NaN(NaN-NaN)                     | 0.585(0.435-0.736)               | NaN(NaN-NaN)       | 0.607(0.412-0.802) |
| SVM          | 0.980 (0.952-1.000) | 0.610(0.569-0.651) | 0.962(0.958-0.965) | 0.970(0.965-0.975) | 0.961(0.952-0.970) | 0.992(0.991-0.994)               | 0.829(0.812-0.847)               | 0.981(0.979-0.983) | 0.867(0.857-0.877) |
| KNN          | 0.992 (0.982-1.000) | 0.840(0.762-0.918) | 0.691(0.460-0.922) | 0.947(0.933-0.962) | 0.975(0.961-0.988) | NaN(NaN-NaN)                     | 0.524(0.359-0.689)               | NaN(NaN-NaN)       | 0.533(0.303-0.763) |

Supplementary Table S5: The mean result of 10 single runs of the machine learning (ML) model for the testing set in RA vs. HC.

| ML model     | AUC(95%CI)          | cutof(95%CI)       | Accuracy(95%CI)    | Sensitivity(95%CI) | Specificity(95%CI) | Positive predictive value(95%CI) | Negative predictive value(95%CI) | F1 score(95%CI)    | Kappa(95%CI)       |
|--------------|---------------------|--------------------|--------------------|--------------------|--------------------|----------------------------------|----------------------------------|--------------------|--------------------|
| XGBoost      | 0.972 (NaN-NaN)     | 0.906(0.877-0.934) | 0.950(0.934-0.966) | 0.974(0.958-0.990) | 0.975(0.926-1.024) | 0.993(0.985-1.002)               | 0.754(0.663-0.845)               | 0.983(0.974-0.993) | 0.807(0.732-0.882) |
| logistic     | 0.989 (NaN-NaN)     | 0.664(0.616-0.712) | 0.958(0.942-0.975) | 0.972(0.953-0.992) | 0.978(0.934-1.021) | 0.983(0.967-0.998)               | 0.851(0.768-0.934)               | 0.977(0.964-0.990) | 0.856(0.797-0.916) |
| LightGBM     | 0.966 (NaN-NaN)     | 0.873(0.832-0.915) | 0.925(0.896-0.954) | 0.925(0.884-0.966) | 0.975(0.942-1.008) | 0.973(0.956-0.989)               | 0.737(0.619-0.854)               | 0.948(0.920-0.976) | 0.722(0.632-0.811) |
| RandomForest | 0.979 (NaN-NaN)     | 0.700(0.631-0.769) | 0.922(0.883-0.961) | 0.967(0.939-0.996) | 0.980(0.941-1.019) | 0.983(0.969-0.998)               | 0.729(0.589-0.869)               | 0.975(0.954-0.996) | 0.743(0.617-0.869) |
| AdaBoost     | 0.983 (NaN-NaN)     | 0.695(0.660-0.730) | 0.897(0.862-0.933) | 0.952(0.904-1.001) | 1.000(1.000-1.000) | 0.989(0.974-1.004)               | 0.600(0.478-0.723)               | 0.970(0.937-1.002) | 0.662(0.549-0.774) |
| CNB          | 0.755 (0.601-0.908) | 0.747(0.682-0.812) | 0.678(0.624-0.731) | 0.667(0.600-0.734) | 1.000(1.000-1.000) | 0.972(0.952-0.993)               | 0.302(0.255-0.349)               | 0.787(0.739-0.835) | 0.293(0.231-0.356) |
| MLP          | 0.808 (NaN-NaN)     | 0.915(0.773-1.057) | 0.786(0.590-0.982) | 0.766(0.540-0.992) | 0.971(0.934-1.009) | NaN(NaN-NaN)                     | 0.662(0.467-0.857)               | NaN(NaN-NaN)       | 0.615(0.399-0.831) |
| SVM          | 0.983 (NaN-NaN)     | 0.610(0.569-0.651) | 0.956(0.941-0.970) | 0.974(0.957-0.990) | 0.983(0.951-1.016) | 0.987(0.976-0.997)               | 0.799(0.729-0.868)               | 0.980(0.969-0.991) | 0.825(0.787-0.864) |
| KNN          | 0.974 (NaN-NaN)     | 0.840(0.762-0.918) | 0.694(0.471-0.917) | 0.968(0.949-0.987) | 0.969(0.928-1.010) | NaN(NaN-NaN)                     | 0.492(0.319-0.664)               | NaN(NaN-NaN)       | 0.489(0.266-0.717) |

Supplementary Table S6: The mean result of 10 single runs of the machine learning (ML) model for the training set in RA vs. OA.

| ML model     | AUC(95%CI)          | cutof(95%CI)       | Accuracy(95%CI)    | Sensitivity(95%CI) | Specificity(95%CI) | Positive predictive value(95%CI) | Negative predictive value(95%CI) | F1 score(95%CI)    | Kappa(95%CI)        |
|--------------|---------------------|--------------------|--------------------|--------------------|--------------------|----------------------------------|----------------------------------|--------------------|---------------------|
| XGBoost      | 1.000 (NaN-NaN)     | 0.606(0.549-0.664) | 0.993(0.993-0.993) | 1.000(1.000-1.000) | 1.000(1.000-1.000) | 1.000(1.000-1.000)               | 0.946(0.943-0.949)               | 1.000(1.000-1.000) | 0.968(0.966-0.970)  |
| logistic     | 0.921 (0.862-0.981) | 0.810(0.786-0.835) | 0.855(0.842-0.868) | 0.865(0.848-0.882) | 0.843(0.817-0.869) | 0.974(0.970-0.978)               | 0.466(0.430-0.503)               | 0.916(0.907-0.924) | 0.519(0.485-0.552)  |
| LightGBM     | 1.000 (NaN-NaN)     | 0.751(0.693-0.809) | 0.993(0.993-0.993) | 1.000(1.000-1.000) | 1.000(1.000-1.000) | 1.000(1.000-1.000)               | 0.946(0.942-0.950)               | 1.000(1.000-1.000) | 0.968(0.966-0.970)  |
| RandomForest | 1.000 (NaN-NaN)     | 0.675(0.616-0.734) | 0.987(0.979-0.995) | 1.000(1.000-1.000) | 1.000(1.000-1.000) | 1.000(1.000-1.000)               | 0.913(0.866-0.959)               | 1.000(1.000-1.000) | 0.945(0.913-0.978)  |
| AdaBoost     | 1.000 (NaN-NaN)     | 0.541(0.535-0.547) | 0.993(0.993-0.993) | 1.000(1.000-1.000) | 1.000(1.000-1.000) | 1.000(1.000-1.000)               | 0.946(0.943-0.950)               | 1.000(1.000-1.000) | 0.968(0.967-0.970)  |
| CNB          | 0.532 (0.430-0.634) | 0.605(0.532-0.679) | 0.473(0.438-0.507) | 0.425(0.381-0.468) | 0.867(0.825-0.909) | 0.957(0.943-0.971)               | 0.176(0.165-0.188)               | 0.585(0.541-0.628) | 0.106(0.095-0.117)  |
| MLP          | 0.618 (0.533-0.703) | 1.048(0.901-1.195) | 0.533(0.349-0.717) | 0.487(0.271-0.704) | 0.904(0.841-0.968) | NaN(NaN-NaN)                     | 0.251(0.184-0.318)               | NaN(NaN-NaN)       | 0.221(0.114-0.327)  |
| SVM          | 0.813 (0.690-0.936) | 0.853(0.873-0.893) | 0.851(0.844-0.858) | 0.881(0.875-0.887) | 0.702(0.677-0.727) | 0.952(0.947-0.958)               | 0.446(0.432-0.461)               | 0.915(0.911-0.920) | 0.461(0.442-0.480)  |
| KNN          | 0.939 (0.897-0.980) | 0.980(0.941-1.019) | 0.191(0.066-0.315) | 0.735(0.690-0.781) | 0.983(0.951-1.016) | NaN(NaN-NaN)                     | 0.150(0.105-0.194)               | NaN(NaN-NaN)       | 0.041(-0.039-0.121) |

Supplementary Table S7: The mean result of 10 single runs of the machine learning (ML) model for the testing set in RA vs. OA.

| 分类模型         | AUC(95%CI)          | cutof(95%CI)       | 准确度(95%CI)         | 灵敏度(95%CI)         | 特异度(95%CI)         | 阳性预测值(95%CI)       | 阴性预测值(95%CI)       | F1分数(95%CI)        | Kappa(95%CI)        |
|--------------|---------------------|--------------------|--------------------|--------------------|--------------------|--------------------|--------------------|--------------------|---------------------|
| XGBoost      | 0.801 (NaN-NaN)     | 0.606(0.549-0.664) | 0.891(0.858-0.925) | 0.901(0.844-0.958) | 0.801(0.704-0.897) | 0.936(0.909-0.963) | NaN(NaN-NaN)       | 0.917(0.878-0.956) | 0.444(0.251-0.636)  |
| logistic     | 0.935 (0.844-0.998) | 0.810(0.786-0.835) | 0.840(0.799-0.881) | 0.839(0.754-0.924) | 1.000(1.000-1.000) | 0.978(0.962-0.994) | 0.427(0.327-0.528) | 0.898(0.835-0.961) | 0.474(0.376-0.572)  |
| LightGBM     | 0.869 (NaN-NaN)     | 0.751(0.693-0.809) | 0.906(0.891-0.920) | 0.924(0.889-0.959) | 0.874(0.781-0.967) | 0.958(0.936-0.979) | 0.619(0.471-0.767) | 0.939(0.920-0.958) | 0.568(0.474-0.661)  |
| RandomForest | 0.798 (NaN-NaN)     | 0.675(0.616-0.734) | 0.880(0.831-0.929) | 0.808(0.624-0.993) | 0.849(0.740-0.959) | 0.940(0.911-0.968) | 0.540(0.357-0.723) | 0.825(0.641-1.010) | 0.482(0.291-0.673)  |
| AdaBoost     | 0.895 (0.748-1.000) | 0.541(0.535-0.547) | 0.883(0.850-0.916) | 0.890(0.812-0.967) | 0.878(0.787-0.968) | 0.952(0.931-0.973) | 0.505(0.404-0.607) | 0.915(0.867-0.964) | 0.497(0.375-0.618)  |
| CNB          | 0.482 (NaN-NaN)     | 0.605(0.532-0.679) | 0.406(0.364-0.447) | 0.379(0.293-0.465) | 0.969(0.926-1.012) | 0.907(0.848-0.965) | 0.139(0.101-0.176) | 0.525(0.436-0.615) | 0.022(-0.018-0.061) |
| MLP          | 0.611 (NaN-NaN)     | 1.048(0.901-1.195) | 0.534(0.367-0.701) | 0.561(0.306-0.816) | 0.910(0.791-1.029) | NaN(NaN-NaN)       | 0.224(0.174-0.274) | NaN(NaN-NaN)       | 0.166(0.073-0.258)  |
| SVM          | 0.721 (0.384-0.966) | 0.883(0.873-0.893) | 0.800(0.772-0.828) | 0.874(0.737-1.011) | 0.680(0.521-0.839) | 0.933(0.906-0.960) | 0.330(0.245-0.415) | 0.887(0.790-0.984) | 0.294(0.198-0.390)  |
| KNN          | 0.769 (NaN-NaN)     | 0.980(0.941-1.019) | 0.183(0.064-0.302) | 0.823(0.764-0.882) | 0.707(0.583-0.831) | NaN(NaN-NaN)       | 0.131(0.100-0.163) | NaN(NaN-NaN)       | 0.015(-0.014-0.043) |
